# Supplementary material for: In Silico Identification of Potential Inhibitors of the SARS-CoV-2 Main Protease among a PubChem Database of Avian Infectious Bronchitis Virus 3CLPro Inhibitors
Source: MDPI journal article supplement (doi:10.3390/biom13060956), 2023-06-07
Supplement: s1 [file s1]

***In silico* identification of potential inhibitors of the SARS-CoV-2 Main protease among a  
PubChem database of avian infectious bronchitis virus 3CLPro inhibitors**

Laurent Soulère<sup>1\*</sup>, Thibaut Barbier<sup>1</sup> and Yves Queneau<sup>1</sup>

<sup>1</sup> Univ Lyon, INSA Lyon, Université Claude Bernard Lyon 1, CPE Lyon, UMR 5246, CNRS, ICBMS, Institut de Chimie et de Biochimie Moléculaires et Supramoléculaires, Bât. E. Lederer, 1 rue Victor Grignard F-69622 Villeurbanne, France.

\*Corresponding author Laurent Soulère (laurent.soulere@insa-lyon.fr)

**Supplementary information**

**Table S1.** Compound CID of the 40 potential covalent inhibitors.

|           |          |         |         |
|-----------|----------|---------|---------|
| 135403580 | 23844236 | 7314640 | 6903089 |
| 5928454   | 5918347  | 5735038 | 5734448 |
| 4961648   | 4961646  | 4868361 | 4437603 |
| 4381126   | 3912197  | 3859741 | 3811656 |
| 3735802   | 3686662  | 3592691 | 3555173 |
| 3473830   | 3192987  | 3162837 | 2526861 |
| 2454965   | 2440506  | 2416356 | 2412504 |
| 2134372   | 2104090  | 2064069 | 2017227 |
| 1537038   | 1177253  | 1154427 | 859620  |
| 843322    | 738894   | 660907  | 625593  |

**Table S2.** Summary of results in order of docking score (kcal/mol).

|                       |                         |                        |
|-----------------------|-------------------------|------------------------|
| 1. 1632360 -9.92      | 126. 3192987 -8.20434   | 259. 2890716 -7.53104  |
| 2. 645492 -9.73855    | 127. 9566958 -8.20273   | 260. 2815694 -7.52643  |
| 3. 4586109 -9.66179   | 128. 3206178 -8.19011   | 261. 4868361 -7.51938  |
| 4. 2193552 -9.58966   | 129. 16825531 -8.17704  | 262. 24789625 -7.51891 |
| 5. 654498 -9.53933    | 130. 2853037 -8.16736   | 263. 3878400 -7.50038  |
| 6. 2106192 -9.51193   | 131. 135845989 -8.15589 | 264. 1069254 -7.49395  |
| 7. 2734449 -9.50301   | 132. 2452051 -8.15212   | 265. 24820042 -7.47138 |
| 8. 649868 -9.49126    | 133. 5399054 -8.13972   | 266. 3162837 -7.47007  |
| 9. 24789769 -9.47309  | 134. 9596269 -8.13802   | 267. 2497380 -7.46669  |
| 10. 2898209 -9.46584  | 135. 5824720 -8.13435   | 268. 4944777 -7.46307  |
| 11. 3191728 -9.44825  | 136. 677475 -8.12396    | 269. 4418 -7.4629      |
| 12. 652480 -9.36413   | 137. 2017227 -8.10258   | 270. 799395 -7.46181   |
| 13. 1250233 -9.27835  | 138. 2108058 -8.10089   | 271. 4395364 -7.46143  |
| 14. 1007780 -9.20512  | 139. 2993330 -8.10087   | 272. 676085 -7.45824   |
| 15. 3178307 -9.17304  | 140. 3240186 -8.0951    | 273. 2814665 -7.45753  |
| 16. 970829 -9.13668   | 141. 3128209 -8.08638   | 274. 2348921 -7.45184  |
| 17. 3129448 -9.11774  | 142. 16007641 -8.08004  | 275. 3196508 -7.44268  |
| 18. 893627 -9.0865    | 143. 24790237 -8.07894  | 276. 6460643 -7.43278  |
| 19. 1327906 -9.06878  | 144. 2870407 -8.07892   | 277. 3555173 -7.42276  |
| 20. 3197965 -9.06648  | 145. 807412 -8.07041    | 278. 4438422 -7.42077  |
| 21. 2385601 -9.06124  | 146. 1117371 -8.06726   | 279. 4900532 -7.40898  |
| 22. 24817257 -9.0573  | 147. 2057118 -8.06577   | 280. 2449860 -7.4037   |
| 23. 12005302 -9.04904 | 148. 661510 -8.06089    | 281. 5713900 -7.39864  |
| 24. 951610 -9.04096   | 149. 6023693 -8.05721   | 282. 3237441 -7.39671  |
| 25. 648736 -9.0309    | 150. 2815268 -8.05629   | 283. 24819855 -7.39349 |
| 26. 3929515 -9.02983  | 151. 1304219 -8.05366   | 284. 9563422 -7.38664  |
| 27. 3475954 -9.02289  | 152. 6880919 -8.05235   | 285. 3293421 -7.37769  |
| 28. 2965851 -9.0223   | 153. 2974727 -8.0511    | 286. 2815848 -7.37555  |
| 29. 3198832 -8.99767  | 154. 2417657 -8.04805   | 287. 2472898 -7.37539  |
| 30. 1420934 -8.9706   | 155. 3962842 -8.04607   | 288. 2416356 -7.37334  |
| 31. 3202425 -8.9593   | 156. 3235672 -8.03114   | 289. 6465235 -7.36997  |
| 32. 1768585 -8.95878  | 157. 1189783 -8.03083   | 290. 1975036 -7.36272  |
| 33. 24789497 -8.95446 | 158. 660907 -8.02645    | 291. 2917531 -7.35955  |
| 34. 2356903 -8.9378   | 163. 1010988 -8.00793   | 292. 722579 -7.34384   |
| 35. 4181547 -8.91597  | 164. 24790050 -7.9995   | 293. 2813012 -7.3399   |
| 36. 2925127 -8.91187  | 165. 826461 -7.99788    | 294. 5918347 -7.33494  |

|               |          |                |          |                |          |
|---------------|----------|----------------|----------|----------------|----------|
| 37. 2829992   | -8.91049 | 166. 4371580   | -7.99744 | 295. 3110581   | -7.3256  |
| 38. 2928698   | -8.89488 | 167. 24820087  | -7.99533 | 296. 24790041  | -7.31994 |
| 39. 16017527  | -8.88818 | 168. 24817255  | -7.99471 | 297. 5897880   | -7.28826 |
| 40. 16812389  | -8.8826  | 169. 135403580 | -7.98943 | 298. 930620    | -7.28801 |
| 41. 644611    | -8.86571 | 170. 4381126   | -7.97039 | 299. 1936560   | -7.28217 |
| 42. 5114648   | -8.85093 | 171. 2915854   | -7.96382 | 300. 2440506   | -7.27198 |
| 43. 4187185   | -8.84409 | 172. 2971444   | -7.96192 | 301. 765284    | -7.26409 |
| 44. 2410199   | -8.83455 | 173. 1008368   | -7.96162 | 302. 3686662   | -7.26236 |
| 45. 16034541  | -8.8304  | 174. 4679126   | -7.95729 | 303. 4961646   | -7.25739 |
| 46. 3221960   | -8.81198 | 175. 1160939   | -7.95248 | 304. 2739954   | -7.25624 |
| 47. 135531840 | -8.78196 | 176. 741948    | -7.93507 | 305. 4220289   | -7.25432 |
| 48. 3590295   | -8.77158 | 177. 4189659   | -7.93463 | 306. 675749    | -7.25253 |
| 49. 6236746   | -8.76236 | 178. 2458897   | -7.93165 | 307. 805223    | -7.24918 |
| 50. 5717      | -8.75468 | 179. 2870396   | -7.92167 | 308. 710241    | -7.24417 |
| 51. 22551764  | -8.74868 | 180. 4910360   | -7.92089 | 309. 972394    | -7.24199 |
| 52. 135497987 | -8.74468 | 181. 2064069   | -7.91399 | 310. 9661081   | -7.23867 |
| 53. 655942    | -8.72583 | 182. 3992501   | -7.90199 | 311. 2406331   | -7.22918 |
| 54. 778154    | -8.71022 | 183. 6903089   | -7.89867 | 312. 1249482   | -7.22681 |
| 55. 1295693   | -8.70192 | 184. 9557232   | -7.89733 | 313. 135484279 | -7.22036 |
| 56. 649398    | -8.67937 | 185. 2808586   | -7.89542 | 314. 16404473  | -7.20407 |
| 57. 9563955   | -8.67512 | 186. 9585555   | -7.89447 | 315. 1154427   | -7.20204 |
| 58. 3196510   | -8.6511  | 187. 3237586   | -7.88875 | 316. 2310813   | -7.19879 |
| 59. 2301119   | -8.64617 | 188. 2323124   | -7.88743 | 317. 3158067   | -7.19735 |
| 60. 3091264   | -8.64133 | 189. 2526861   | -7.87817 | 318. 2102546   | -7.18544 |
| 61. 3191638   | -8.63335 | 190. 1214257   | -7.87137 | 319. 644661    | -7.18237 |
| 62. 24819986  | -8.62912 | 191. 4447969   | -7.86238 | 320. 2083510   | -7.17396 |
| 63. 859620    | -8.62852 | 192. 1224165   | -7.85769 | 321. 1092464   | -7.16823 |
| 64. 1831132   | -8.62295 | 193. 1907744   | -7.85036 | 322. 5928454   | -7.15587 |
| 65. 1295791   | -8.61462 | 194. 9549963   | -7.84345 | 323. 2078229   | -7.14222 |
| 66. 1312344   | -8.60582 | 195. 2997527   | -7.84222 | 324. 3242436   | -7.13751 |
| 67. 664943    | -8.60251 | 196. 887990    | -7.83157 | 325. 4836362   | -7.12886 |
| 68. 4907806   | -8.55872 | 197. 4330749   | -7.82774 | 326. 3794723   | -7.12659 |
| 69. 24790407  | -8.54843 | 198. 728528    | -7.82154 | 327. 986562    | -7.11671 |
| 70. 6904494   | -8.54456 | 199. 3191502   | -7.82036 | 328. 740914    | -7.1036  |
| 71. 2558401   | -8.54403 | 200. 7254819   | -7.81794 | 329. 2998767   | -7.09836 |
| 72. 6470683   | -8.54183 | 201. 859639    | -7.81734 | 330. 211186    | -7.07389 |
| 73. 645365    | -8.54119 | 202. 2282752   | -7.81668 | 331. 4621376   | -7.05822 |
| 74. 2849510   | -8.53732 | 203. 930290    | -7.81656 | 332. 24817263  | -7.05523 |
| 75. 2966254   | -8.52518 | 204. 3245569   | -7.81166 | 333. 3640363   | -7.05073 |
| 76. 3196509   | -8.52323 | 205. 9566932   | -7.80815 | 334. 880528    | -7.04625 |
| 77. 3152897   | -8.52246 | 206. 7314640   | -7.80713 | 335. 5741945   | -7.03546 |
| 78. 3774350   | -8.51215 | 207. 2134372   | -7.80655 | 336. 4437603   | -7.00567 |
| 79. 4175307   | -8.50259 | 208. 135693201 | -7.80403 | 337. 1299520   | -7.00428 |
| 80. 135684269 | -8.48387 | 209. 16017324  | -7.79686 | 338. 2963113   | -7.00305 |
| 81. 5756577   | -8.46296 | 210. 2104090   | -7.79091 | 339. 17582529  | -7.00268 |
| 82. 2121076   | -8.46175 | 211. 16019819  | -7.78421 | 340. 1120962   | -6.9986  |
| 83. 5735038   | -8.44614 | 212. 4182036   | -7.78306 | 341. 843322    | -6.99648 |
| 84. 73157     | -8.43978 | 213. 2898168   | -7.78222 | 342. 4961648   | -6.99184 |
| 85. 24817254  | -8.43505 | 214. 4542341   | -7.77263 | 343. 2333509   | -6.96988 |
| 86. 615593    | -8.43126 | 215. 649992    | -7.77205 | 344. 87247     | -6.9553  |
| 87. 738894    | -8.42879 | 216. 5824722   | -7.76972 | 345. 2294766   | -6.94213 |

|                |          |               |          |                                |          |
|----------------|----------|---------------|----------|--------------------------------|----------|
| 88. 5302421    | -8.41654 | 217. 20903731 | -7.76884 | 346. 2147111                   | -6.92723 |
| 89. 2949086    | -8.3926  | 218. 3473830  | -7.76858 | 347. 17584476                  | -6.92627 |
| 90. 1891999    | -8.39107 | 219. 1083882  | -7.76511 | 348. 2845421                   | -6.90861 |
| 91. 648374     | -8.38488 | 220. 597363   | -7.76367 | 349. 22515899                  | -6.89952 |
| 92. 3206295    | -8.37375 | 221. 22518136 | -7.75643 | 350. 2454965                   | -6.87649 |
| 93. 2396278    | -8.3701  | 222. 2561190  | -7.75263 | 351. 17580184                  | -6.85425 |
| 94. 2870196    | -8.35766 | 223. 20862125 | -7.75103 | 352. 4377849                   | -6.84425 |
| 95. 3037       | -8.35016 | 224. 659929   | -7.74981 | 353. 22583081                  | -6.80264 |
| 96. 5734490    | -8.34672 | 225. 3592691  | -7.74671 | 354. 17583883                  | -6.80204 |
| 97. 22517479   | -8.34412 | 226. 708625   | -7.73773 | 355. 16807543                  | -6.77372 |
| 98. 3191469    | -8.34175 | 227. 4917203  | -7.73736 | 356. 9637339                   | -6.76054 |
| 99. 3257857    | -8.33959 | 228. 2078638  | -7.73099 | 357. 1188014                   | -6.75284 |
| 100. 3239069   | -8.33664 | 229. 1121490  | -7.72921 | 358. 1537038                   | -6.75275 |
| 101. 1177253   | -8.33521 | 230. 3198732  | -7.72783 | 359. 601670                    | -6.73867 |
| 102. 3244307   | -8.33007 | 231. 2999977  | -7.71084 | 360. 736374                    | -6.73149 |
| 103. 1475477   | -8.3279  | 232. 9550250  | -7.70815 | 361. 215090                    | -6.72578 |
| 104. 2514618   | -8.32352 | 233. 3912197  | -7.70573 | 362. 647501                    | -6.70801 |
| 105. 3211933   | -8.32109 | 234. 657485   | -7.6997  | 363. 948801                    | -6.68971 |
| 106. 135451179 | -8.31321 | 235. 2412504  | -7.69793 | 364. 5509654                   | -6.67146 |
| 107. 2229132   | -8.30873 | 236. 9611292  | -7.69345 | 365. 460749                    | -6.64892 |
| 108. 1864299   | -8.30855 | 237. 638860   | -7.6886  | 366. 6403417                   | -6.62583 |
| 109. 135472652 | -8.30565 | 238. 24791295 | -7.68562 | 367. 6470895                   | -6.57876 |
| 110. 6268409   | -8.30147 | 239. 9551063  | -7.68471 | 368. 4794522                   | -6.57814 |
| 111. 2814640   | -8.29469 | 240. 666722   | -7.68222 | 369. 3811656                   | -6.55464 |
| 112. 17379494  | -8.29127 | 241. 2320755  | -7.6689  | 370. 900806                    | -6.51362 |
| 113. 5734448   | -8.285   | 242. 3634352  | -7.66201 | 371. 906542                    | -6.5112  |
| 114. 651774    | -8.27142 | 243. 665102   | -7.65172 | 372. 3859741                   | -6.37181 |
| 115. 5341357   | -8.25559 | 244. 2083279  | -7.62931 | 373. 6246323                   | -6.22226 |
| 116. 3735802   | -8.25503 | 245. 1105927  | -7.62636 | 374. 4137407                   | -6.1767  |
| 117. 2515806   | -8.25437 | 246. 1949127  | -7.61699 | 375. 2057165                   | -6.1189  |
| 118. 2352096   | -8.25242 | 247. 4911266  | -7.60034 | 2443805, no acceptable poses   |          |
| 119. 2939288   | -8.25107 | 248. 54688584 | -7.59864 | 135435911, no acceptable poses |          |
| 120. 761840    | -8.23951 | 249. 705256   | -7.59722 | 54677920, no acceptable poses  |          |
| 121. 2420336   | -8.23546 | 250. 728514   | -7.58977 | 24789460, no acceptable poses  |          |
| 122. 9662819   | -8.23421 | 251. 2530053  | -7.58557 | 16195219, no acceptable poses  |          |
| 123. 9643441   | -8.23392 | 252. 24761221 | -7.5821  | 9666324, no acceptable poses   |          |
| 124. 7996726   | -8.22261 | 253. 2966450  | -7.57932 | 9636511, no acceptable poses   |          |
| 125. 6225958   | -8.2069  | 254. 2149567  | -7.57492 | 9609431, no acceptable poses   |          |
| 159. 2097351   | -8.02097 | 255. 5349620  | -7.57175 | 2958977, no acceptable poses   |          |
| 160. 2384236   | -8.01443 | 256. 2145491  | -7.56374 | 1341336, no acceptable poses   |          |
| 161. 4077726   | -8.01364 | 257. 6878045  | -7.55574 | 1295575, no acceptable poses   |          |
| 162. 24791306  | -8.01078 | 258. 2951459  | -7.53473 | 1009382, no acceptable poses   |          |

**A****Covalent inhibitors**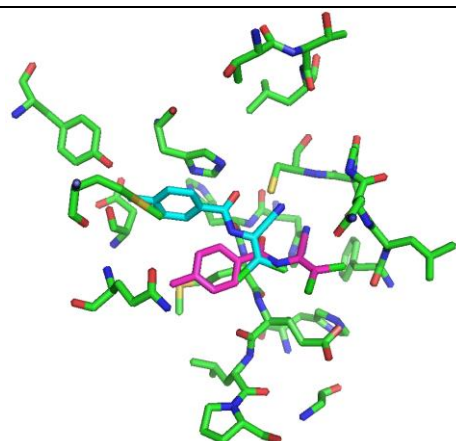**6y2f\_843322**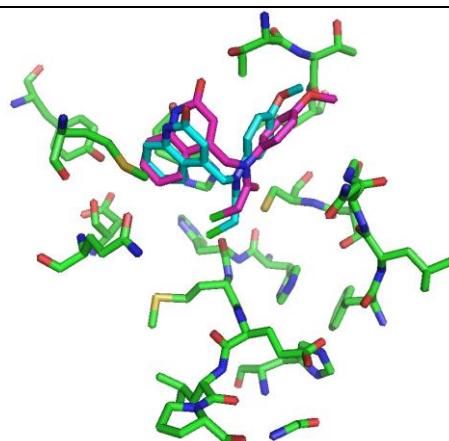**6y2f\_1154427**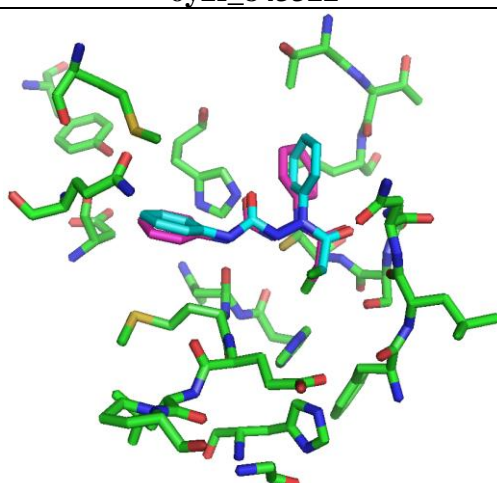**6y2f\_4868361**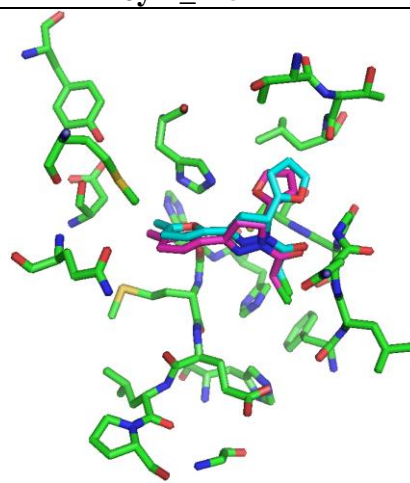**6y2f\_4961646****B****Non-covalent inhibitors**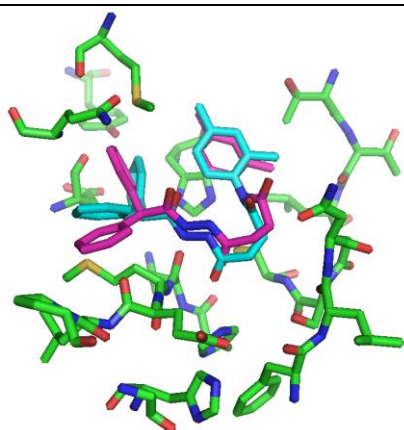**6y2f\_1632360**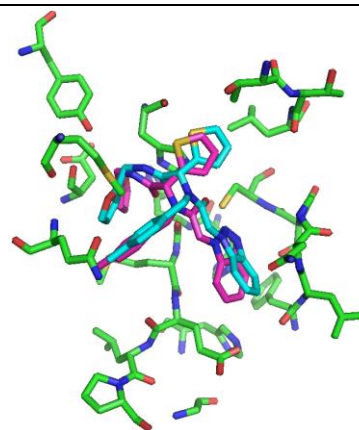**6y2f\_645492**

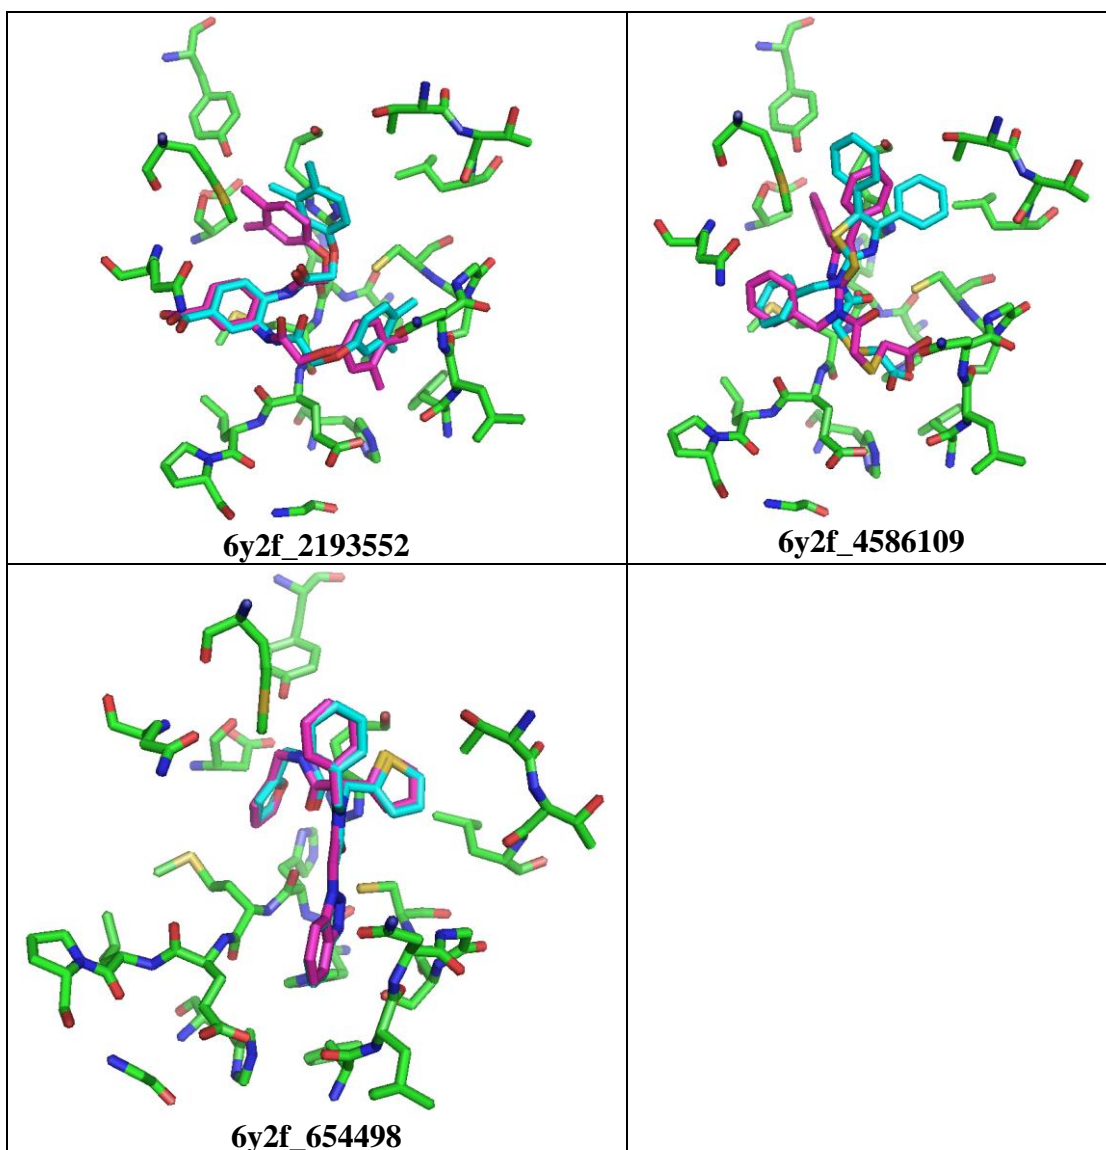

**Figure S1.** Docking experiments using a genetic algorithm. To corroborate the binding modes obtained using the Argusdock engine (in cyan color), docking experiments with a genetic algorithm engine implemented in Arguslab was achieved leading to the binding modes in magenta color. As depicted in the different figures, the binding modes obtained with the two methods are consistent for all compounds with only some differences for the compound **843322**. **A.** Covalent inhibitors. **B.** Non-covalent inhibitors.

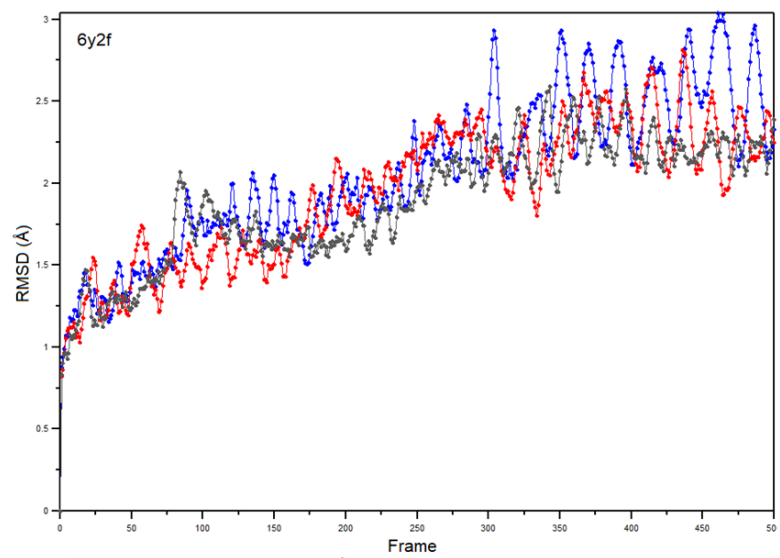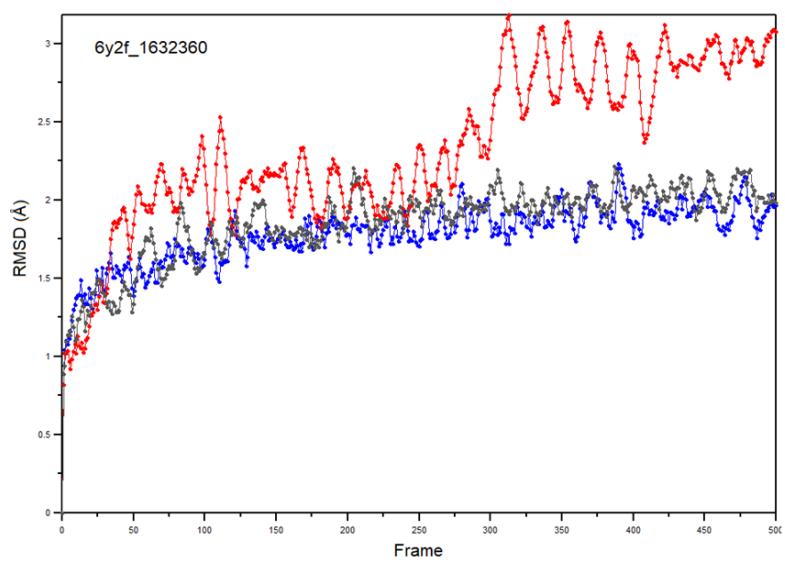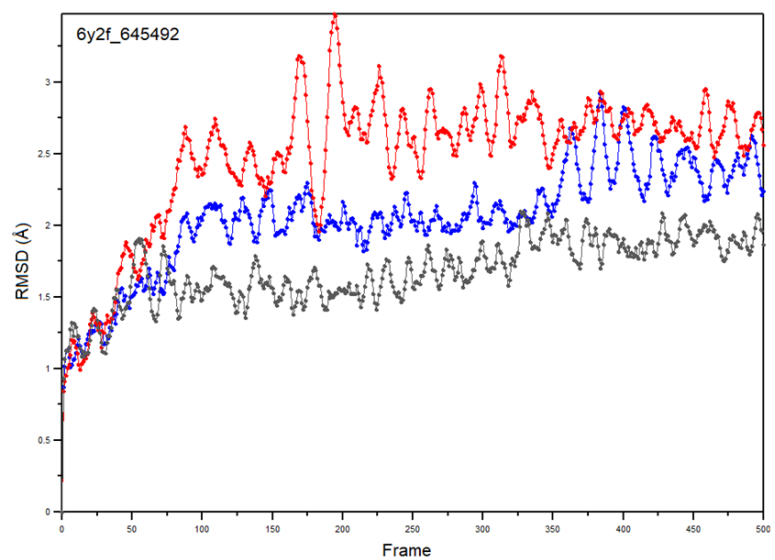

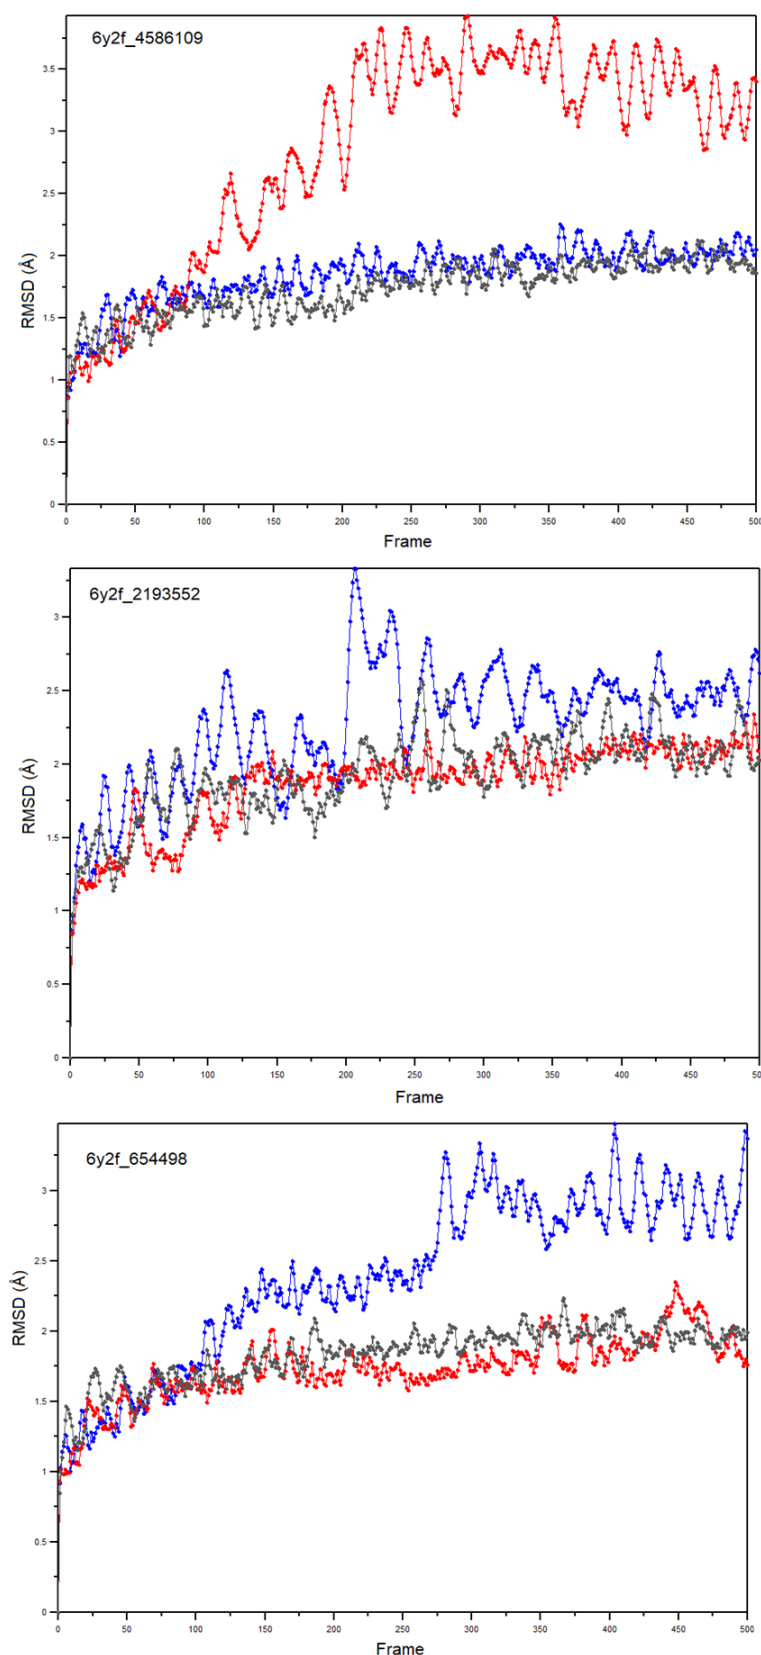

**Figure S2.** Calpha RMSD obtained by molecular dynamics simulations during 500 ps for the protein without ligand and for all reversible complexes. Molecular dynamics simulations were performed for 500 ps in triplicate to ascertain that the complexes between the protein and the potential reversible inhibitors were stable. It could be noted that the different compounds remain tightly bound to the active site during the simulation.
